# Supplementary material for: Synthesis, characterization and immobilization of N-doped TiO2 catalysts by a reformed polymeric precursor method
Source: Royal Society of Chemistry journal article supplement (doi:10.1039/c6ra27187a), 2017-01-01
Supplement: c6ra27187a1.pdf [file c6ra27187a1.pdf]

## Supplemental Information

### Synthesis, characterization and immobilization of N-doped TiO<sub>2</sub> catalyst by a reformed polymeric precursor method

Han Yu <sup>a,b</sup>, Li Ye <sup>a,b</sup>, Tuzi Zhang <sup>a</sup>, Heng Zhou <sup>a</sup>, Tong Zhao <sup>a,b</sup>

<sup>a</sup> *Laboratory of Advanced Polymeric Materials, Institute of Chemistry, Chinese Academy of Sciences, Beijing 100190, P.R. China*

<sup>b</sup> *University of Chinese Academy of Sciences, Beijing 100049, P.R. China*

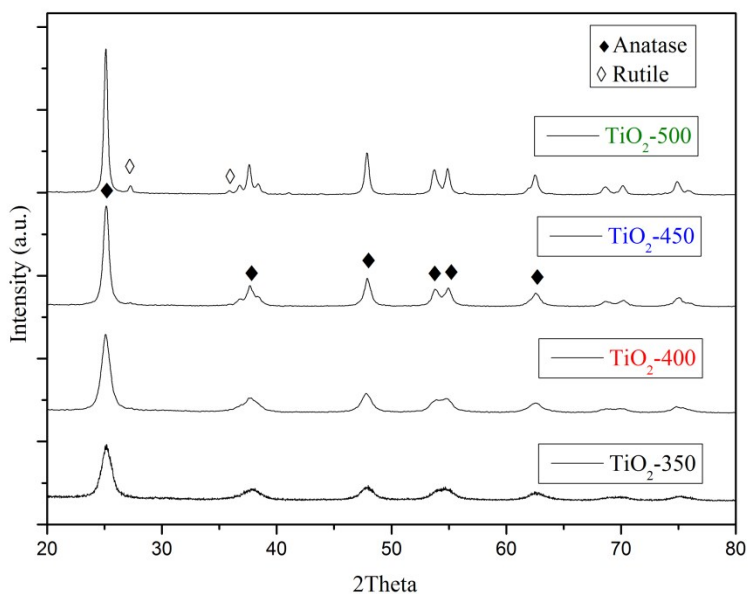

Figure S1. XRD patterns for undoped TiO<sub>2</sub> catalysts with different calcination temperatures

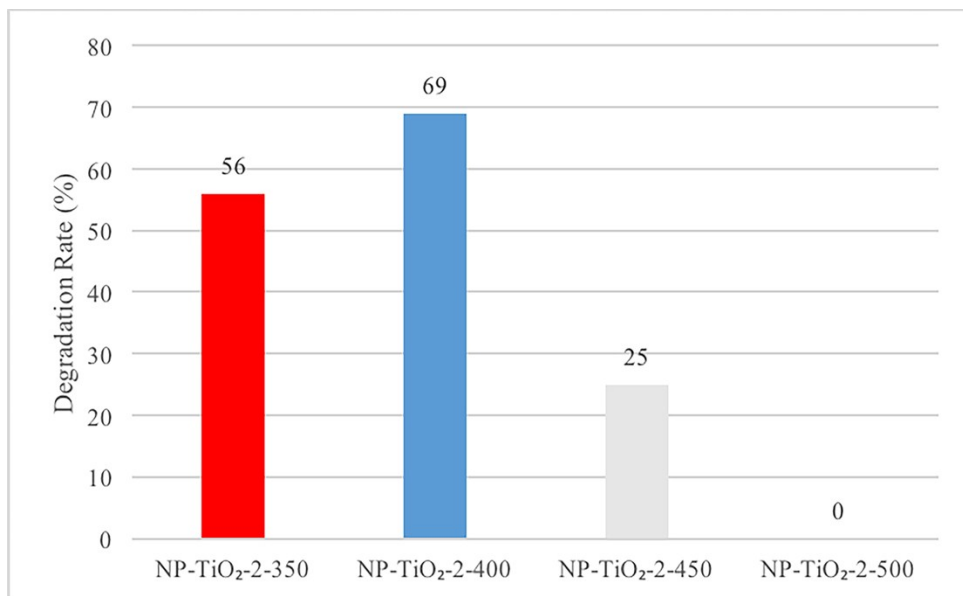

Figure S2. Degradation rates of methyl orange under visible light (4 hours) for PEG modified samples annealed at different temperatures

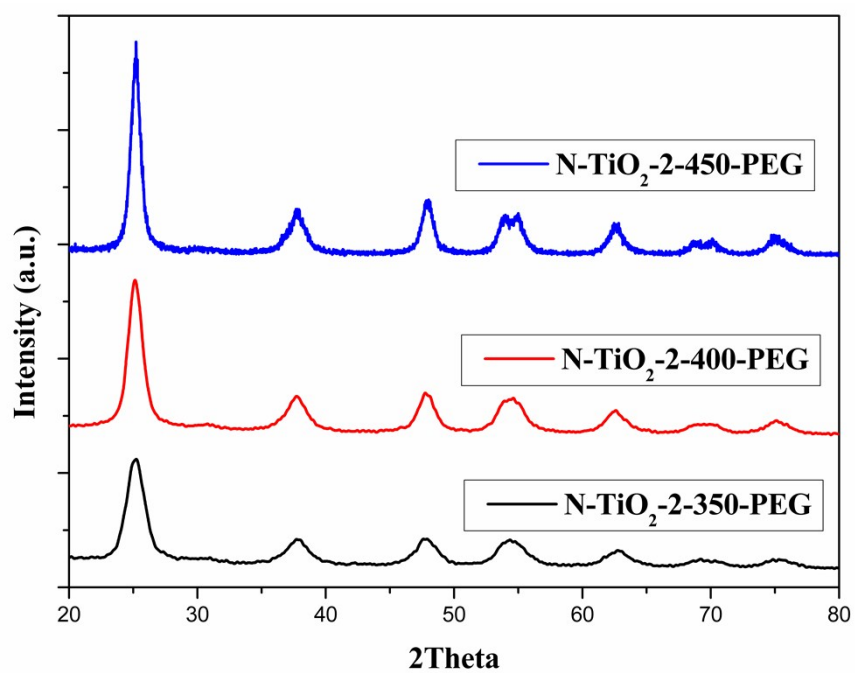

Figure S3. XRD patterns for PEG post-modified samples annealed at different temperatures

---

Table S1 Detailed parameters for QF-1, QF-2 and QF-3

---

| Sample | Coating mass ratio (%) | Mass of spread precursor(g) | Mass of raw quartz fabric (g) | Mass of coated quartz fabric (g) |
|--------|------------------------|-----------------------------|-------------------------------|----------------------------------|
| QF-1   | 20                     | 1.8                         | 0.15                          | 0.18                             |
| QF-3   | 20                     | 0.6                         | 0.15                          | 0.18                             |
| QF-5   | 40                     | 0.36                        | 0.075                         | 0.105                            |

---
